# Supplementary material for: ZnNi alloy nanoparticles grown on reduced graphene oxide nanosheets and their magnetic and catalytic properties
Source: Royal Society of Chemistry journal article supplement (doi:10.1039/c3ra45210g), 2013-11-20
Supplement: c3ra45210g.pdf [file c3ra45210g.pdf]

Electronic Supplementary Information (ESI) for

## ZnNi Alloy Nanoparticles Grown on Reduced Graphene Oxide Nanosheets and Their Magnetic and Catalytic Properties

Jinglei Yang,<sup>a</sup> Xiaoping Shen,<sup>a,\*</sup> Guoxing Zhu,<sup>a</sup> Zhenyuan Ji<sup>b</sup> and Hu Zhou<sup>b</sup>

<sup>a</sup> School of Chemistry and Chemical Engineering, Jiangsu University, Zhenjiang 212013, P. R. China,

<sup>b</sup> School of Materials Science and Engineering, Jiangsu University, Zhenjiang 212013, P. R. China

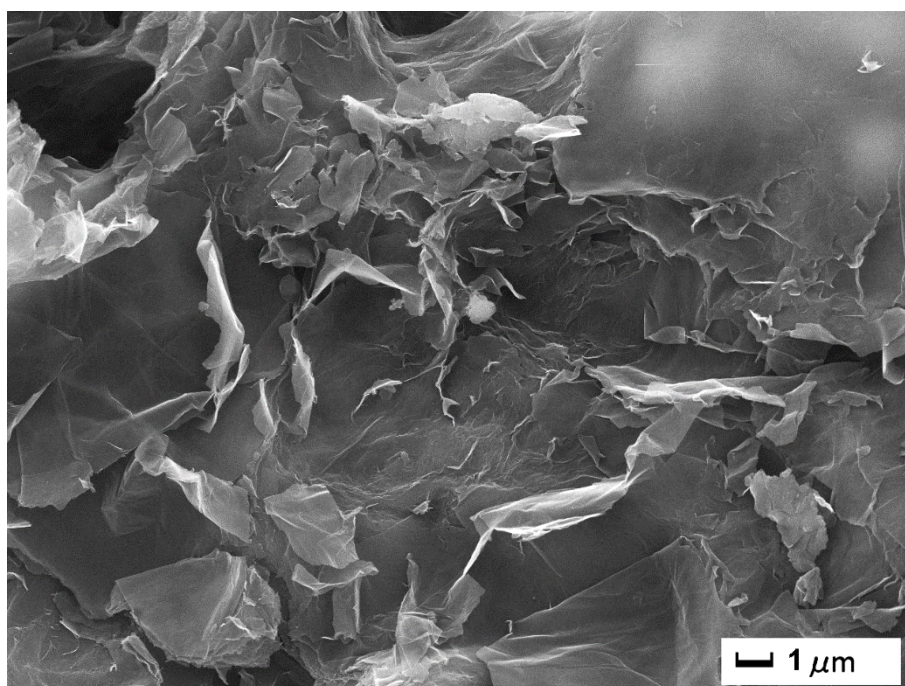

**Fig. S1** FESEM image of RGO nanosheets prepared in the absence of  $\text{Zn}(\text{NO}_3)_2 \cdot 6\text{H}_2\text{O}$  and  $\text{Ni}(\text{NO}_3)_2 \cdot 6\text{H}_2\text{O}$  with the same other experimental conditions.

---

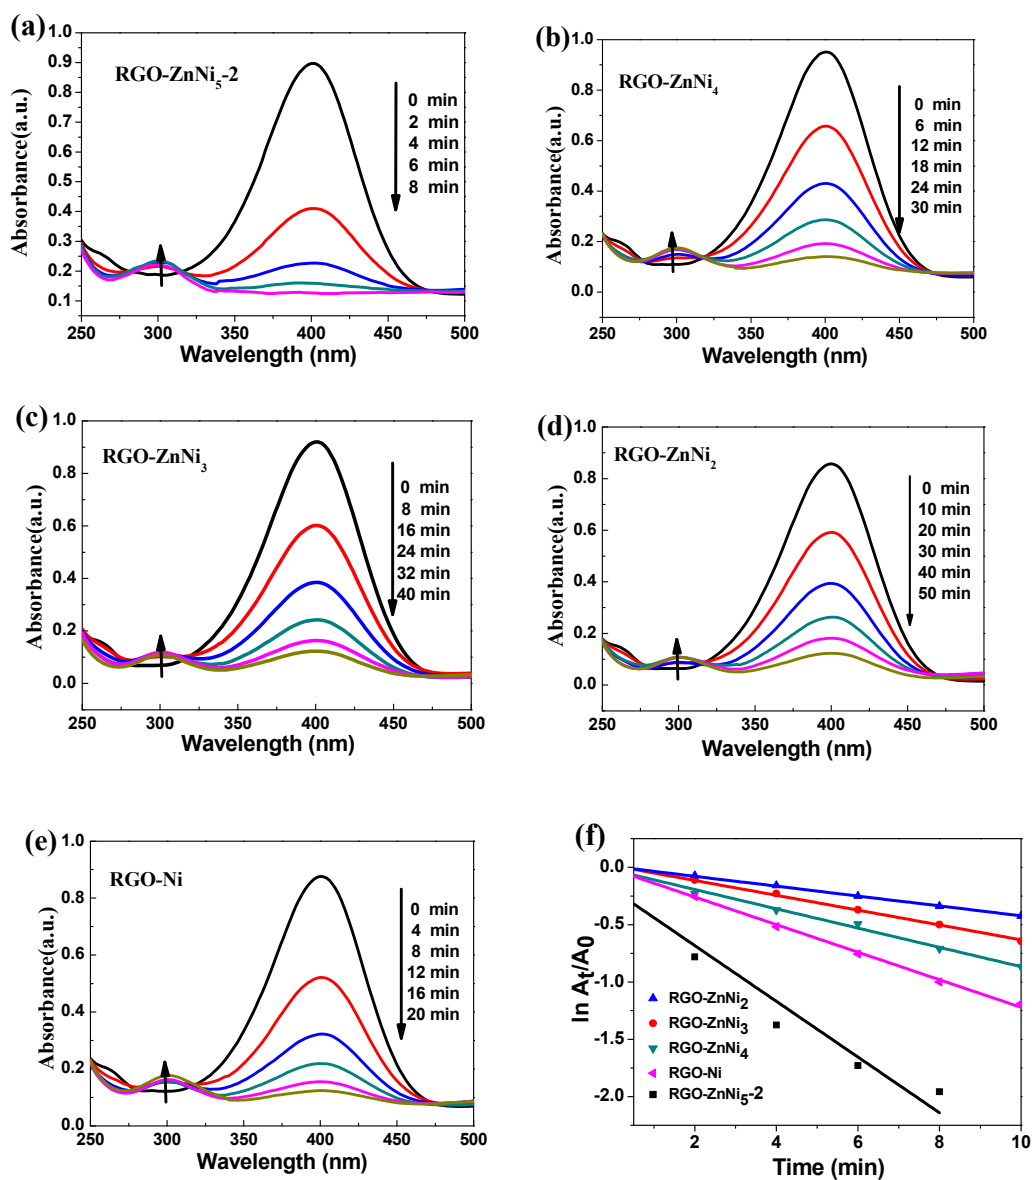

**Fig. S2** (a-e) UV-vis absorption spectra of the reduction reaction systems in the presence of RGO-ZnNi nanocomposites. (f) Plots of  $\ln(A_t/A_0)$  versus reaction time for the reduction of 4-NP catalyzed by different catalysts.

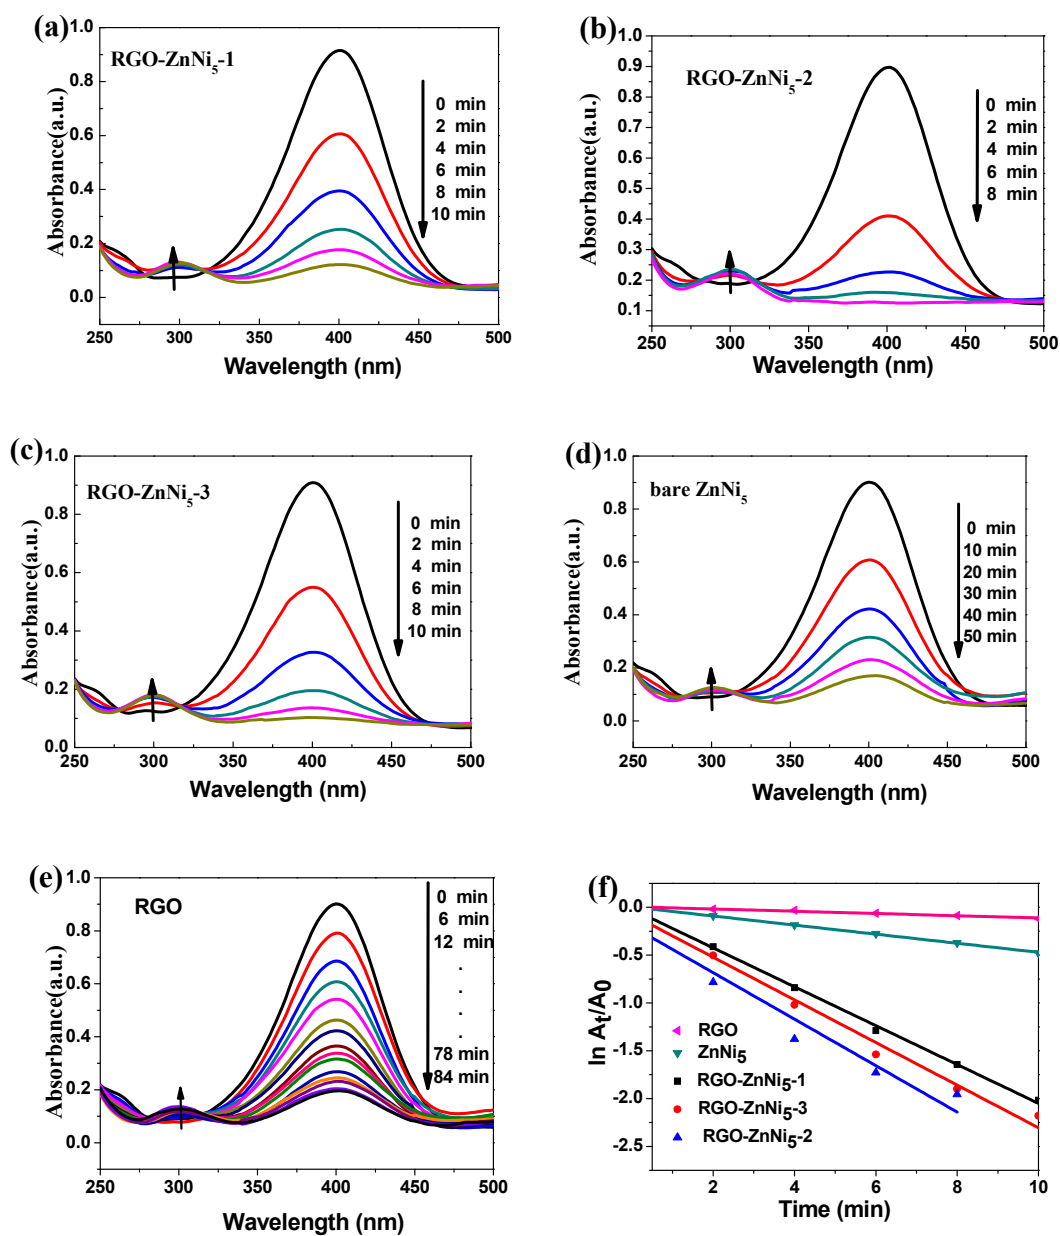

**Fig. S3** (a-e) UV-vis absorption spectra of the reduction reaction systems in the presence of RGO-ZnNi nanocomposites. (f) Plots of  $\ln(A_t/A_0)$  of 4-NP versus reaction time for the reduction of 4-NP catalyzed by different catalysts.
